Reduced gray matter volume in the orbitofrontal cortex is associated with greater body mass index:  
a coordinate-based meta-analysis.

Eunice Y. Chen<sup>1</sup>, PhD & Susan Murray<sup>1</sup> MA, Tania Giovannetti, PhD<sup>2</sup>, David V. Smith, PhD<sup>3</sup>.

<sup>1</sup> TEDp (Temple Eating Disorders program)

Department of Psychology,  
Temple University

<sup>2</sup>Cognitive Neuropsychology Lab

Department of Psychology,  
Temple University.

<sup>2</sup>Neuroeconomics Laboratory,  
Department of Psychology,  
Temple University.

Corresponding author: Eunice Chen, PhD

Associate Professor

Department of Psychology,  
Weiss Hall, 1701 North 13th Street  
Temple University,  
Philadelphia, PA, 19122.

Email: Eunice.Chen@temple.edu

Key words: obesity, ageing, brain imaging, meta-analysis.

Running title: obesity, structural imaging meta-analysis

Conflicts of interest: none.

Data Availability: Thresholded and unthresholded images are available privately in NeuroVault for reviewers until publication.

## Abstract

Meta-analyses of neuroimaging studies have not found a clear relationship between the orbitofrontal cortex and obesity, despite animal and human studies suggesting the contrary. Our primary meta-analysis examined what regions are associated with reduced gray matter volume, given increased body mass index. We identified 23 voxel-based morphometry studies examining the association between gray matter volume and body mass index. In a sample of 6,788 participants, we found that greater body mass index is associated with decreased gray matter volume in the right Brodmann's area 10 and 11, forming part of the right orbitofrontal cortex (FWE,  $p=0.05$ ). Use of Brodmann's areas 10 and 11 as seeds in a Neurosynth network coactivation and text decoding analysis revealed that these regions are associated with studies of emotional regulation and processing, clinical symptoms and disorder, 'mentalizing' and social cognition, and the Default mode network. Our finding uniquely contributes to the literature in showing a relationship between the orbitofrontal cortex and obesity and showing the wide-ranging impact these differences may have on social, mental, and emotional functioning as well as on the Default mode network. Exploratory analyses suggest the need for studies examining the effect of age on these findings.

## Abbreviations:

FWE = Family wise error corrected

fMRI = functional magnetic resonance imaging

## Introduction

Differences in prefrontal functioning and structure play a central role in many models of weight gain, with some models focusing on differences in food reward processing, and others on cognitive control or a combination of these. One influential model by Rolls posits that weight gain may be associated with differences in insula and orbitofrontal cortex functioning<sup>1-4, 3, 5, 6, 7</sup>. This model describes how the insula is important in the integration of sensory responses to food, and orbitofrontal cortex as important in the evaluation and monitoring of food reward. Single-cell recording studies in monkeys and human functional magnetic resonance imaging (fMRI) studies show that the medial orbitofrontal cortex is implicated in sensory-specific satiety<sup>8, 9, 10, 11, 12</sup>. Sensory-specific satiety refers to a particular food losing its rewarding value if consumed, with renewal of appetite with exposure to other types of rewarding tastes<sup>2, 4, 13, 14</sup>. The interacting diathesis between neural differences in obesity and the variety and availability of palatable foods in the food environment is proposed to overwhelm the sensory and satiety systems in ways that encourage over-eating<sup>15, 16</sup>.

Other theories suggest that increased body mass index is associated with reduced cognitive control or increased impulsivity<sup>17, 18, 19</sup>, or combined difficulties in executive functioning and reward processing. These models are supported by functional and structural imaging studies showing that differences in prefrontal regions, including the orbitofrontal cortex, is associated with poorer performance on inhibitory control tasks and greater body mass index<sup>20, 21</sup>. Moreover, evidence from delayed discounting studies shows that preferring small, immediate rewards versus larger, distal rewards is associated with future weight gain and activity within the dorsolateral prefrontal cortex<sup>22, 23</sup>.

Central to these models of weight regulation is the importance of the orbitofrontal cortex in terms of its structure, functioning and integration with multiple brain networks, including the executive-control network, default mode network, and possibly the limbic network<sup>24, 25, 26</sup>. Large-scale meta-analyses show that differences in the functioning and structure of this region may have wide-ranging effects on motoric functioning, pain, affect, cognitive control, reward, social functioning and episodic memory<sup>27, 28, 25, 29</sup>.

Consistent with the aforementioned models of obesity and weight gain, structural neuroimaging studies show that body mass index is associated with decreased volume of the prefrontal cortex across the lifespan. Moreover, body mass index associated atrophy is specific to cortical gray matter<sup>30, 31</sup>. These results also are consistent with human and animal studies that have reported an association between obesity and lower performance on test of executive functioning and memory<sup>32</sup>, cognitive processes associated with the integrity of the prefrontal cortex. Taken together, the extant research offers compelling evidence suggesting that the prefrontal cortical gray matter is particularly important in understanding weight gain and obesity. Thus, the primary aim of the study was to conduct a meta-analysis of studies reporting an association between body mass index and cortical gray matter volume with the goal of answering these questions: (1)

which cortical gray matter regions are associated with body mass index? (2) what neural networks are coactive with cortical gray matter regions associated with body mass index? , (3) and what cognitive processes have been attributed to the cortical gray matter regions associated with body mass index?

Ageing results in greater whole-brain gray matter volume decrement<sup>32</sup>. For instance, gray matter in the prefrontal region declines by 5% each decade after the 20s<sup>33</sup>. However, the extent to which age moderates the relation between body mass index and cortical gray matter volume is unknown. Therefore, an exploratory aim of the present study was to assess if gray matter volume differences in obesity differ in younger versus older participants. A systematic review<sup>30</sup> reported that studies with samples aged 40 years and younger had mixed findings for the association between gray matter temporal lobe atrophy and greater adiposity; while older samples showed associations between greater adiposity and parietal and temporal gray matter atrophy. However, a quantitative meta-analysis is needed to more precisely locate and document the size of the effect of gray matter volume differences in obesity at younger and older ages. To accomplish this, data collected for the primary aim were grouped into a younger age group (below 40 years) or an older age group (40 years and older). Using this data, we explored: (1) the regions of cortical gray matter associated with body mass index in younger samples, and (2) in older samples separately. We compared these two single study meta-analyses with younger and older samples to (3) assess if there was greater gray matter volume decrement associated with greater body mass index in the older or younger samples. Finally, we explored if (4) there was decreased gray matter volume in regions associated with body mass index that overlapped between younger and older samples using a conjunction analysis.

## Materials and Methods

### *Study eligibility criteria and rationale*

Gray matter volume studies were selected by searching by searching the Pubmed database [(‘vbm’ or ‘voxel-based morphometry’)] AND [(‘obesity’) OR (‘eating disorders’) OR (‘body mass index’) OR (‘BMI’)] and ‘gray matter volume’ AND ‘obesity’ for the time prior to August 17th, 2017. Additional studies were found by examining reviews. Inclusion criteria were that studies were in 1) a peer reviewed journal, 2) in English, 3) assessed regional gray matter or white matter using voxel-based morphometry methods, and 4) used Montreal Neurological Institute coordinates or Talairach space, 5) reported T, Z, r or p value describing group differences between overweight and lean individuals or the association between regions of gray matter volume and body mass, and 6) including adults 18 years to 60 years. We used the Centers for Disease Control guidelines which specify a healthy to overweight body mass index range of 18.5 to 29.9<sup>34</sup> for adults.

See *Figure 1* for a Preferred Reporting Items for Systematic Reviews and Meta-Analyses diagram of gray matter studies.

218 abstracts were identified from the Pubmed search with 15 identified from other reviews or meta-analyses. Of these 233 abstracts, 91 abstracts were discarded because these were duplicates. The remaining 142 abstracts were screened and reviews (9 abstracts) or meta-analysis (1 abstract), animal studies (2 abstracts), and non-English language papers (1 abstract) were excluded. Of the 129 abstracts remaining, 106 full-text articles were screened and excluded. Of the 106 full-text articles excluded, 6 articles did not report on gray matter volume findings, (for instance reporting diffusion tensor imaging or cortical thickness outcomes), 36 articles did not report the x, y or z coordinates denoting differences between overweight and lean individuals or where there are differences in gray matter volume between overweight and lean individuals, 23 articles utilized patient samples (e.g., individuals with Aphasia or Prader-Willi syndrome; individuals who meet criteria for Alzheimer's disease, Anorexia Nervosa, Bulimia Nervosa, or diabetes), 8 articles did not compare overweight with healthy weight individuals and instead compared differences between underweight and healthy weight groups, which was not the comparison of interest<sup>34</sup>. 8 articles did not report a whole brain analysis, reporting only a region of interest analysis or a small-volume analysis, 23 did not report body mass index, and 2 articles utilized sample sizes of  $n = 3$  or less.

These exclusion criteria left 23 articles yielding 25 experiment groups for the primary meta-analysis examining the effect of increasing body mass index on gray matter volume, see *Table 1*. By 'experiments' or 'experimental groups' we refer to the separate group analysis that may be reported in an article, for instance, where separate findings for males and females are reported for gray matter volume findings. A majority (23/25) of experiment groups reported that increased body mass index is associated with decreased gray matter volume or that decreased gray matter was associated with overweight relative to healthy weight groups. In contrast, a minority (2/25) of experiments<sup>35</sup> reported increased gray matter volume in overweight relative to healthy weight individuals while 4/25 experiments<sup>36, 37, 38, 39</sup> reported both increased and decreased gray matter volume in overweight relative to healthy-weight individuals. The primary analysis examining the association between increasing body mass index on decreased gray matter volume in 23 experiments was sufficiently powered<sup>40</sup>. Given the small number of experiments reporting the relationship between increasing body mass index and increased gray matter volume, we did not subject this set of experiments to a meta-analysis.

13/23 experiments examined the effect of decreased gray matter volume and increased body mass index included participants below the age of 40 years; 10/23 experiments examined the effect of decreased gray matter volume and increased body mass index in participants 40 years and older. Given the small number of experiments falling below the recommended number,<sup>40</sup>,

we regard the meta-analyses exploring where gray matter volume was reduced in older and younger samples as preliminary.

2/23 experiments included adolescents but also adults<sup>41, 42</sup>. 2/23 experiments were composed of Asian samples<sup>43, 37</sup>, 1/23 experiments with only male participants<sup>43</sup>, and 2/23 experiments<sup>44, 45</sup>, with only female participants.

Two of the 23 experiments reported both group comparisons and correlational relationships<sup>35, 46</sup>. Study findings which were in Talaraich space were converted to Montreal Neurological Institute coordinates<sup>47</sup> and all model results are presented in Montreal Neurological Institute space.

### *Primary analysis*

In order to find the gray matter regions associated with body mass index, we first used the Activation likelihood estimation method implemented in GingerALE 2.3.6 (<http://www.brainmap.org/ale/>). The Activation likelihood estimation method estimates the most likely location for differences in gray matter volume to occur given the studies included and allows for comparison of findings with previous fMRI meta-analyses<sup>48, 49</sup>. The Activation likelihood estimation method creates a likelihood map for each reported peak coordinate by convolving an isotropic kernel with each peak and then modelling the likelihood of reduced or increased gray matter volume in that area as a normally distributed Gaussian probability distribution<sup>50, 51, 52, 53</sup>. Isotropic kernel values assume Euclidean distances between voxels and peaks. Comparison between the modelled activity map, that is the maximum of all the Gaussian distributions<sup>52</sup> for all the experiment foci, and the Activation likelihood estimation null distribution yields a 3 dimensional image for each probability level. A random effects model was used. To correct for multiple comparisons and maintain a cluster-level familywise error rate of 5%, we used a cluster-forming threshold of  $p = 0.001$  with 1,000 random permutations, as suggested in<sup>54</sup>.

The region generated from the GingerALE meta-analysis associated with reduced gray matter volume and increased body mass index was then made into a mask. This mask was then used as a seed to examine the network regions correlated with this region and the topics associated with this network in the over 413,429 coordinates drawn from 11,406 studies in the Neurosynth database (3/28/2018)<sup>55</sup>. The unthresholded reverse inference  $z$ -score ('specificity\_z') generated by the network coactivation analysis was then used in the decoding analysis. The analysis was conducted in *Python 3.6.4*.

For decoding, we used a topics mapping approach<sup>56, 57</sup> in Neurosynth. Poldrack et al (2012)<sup>57</sup> used a latent discriminant analysis to distill studies in the Neurosynth database into 400 distinct topics, each made up of separate terms. Here, a meta-analytic image was generated for each of the 400 topics, then each image was correlated with the unthresholded reverse inference  $z$ -scored

image from the network coactivation analysis to derive a decoding score. Greater positive correlations provided evidence that our network coactivation results appear more similar to studies associated with that particular topic.

### *Exploratory Analysis*

For the exploratory analysis, we took the gray matter volume data examining the effects of body mass index that were collected for the primary aim, and divided this into younger age groups (below 40 years) and older age groups (40 years and older). Although underpowered<sup>40</sup>, we wanted to explore the location(s) of gray matter volume reductions associated with greater body mass index in younger samples with an average age below 40 years. For this we used 13/23 experiments where the mean age of the sample was below 40 years. We also wanted to explore the location(s) of gray matter volume reductions associated with greater body mass index in older samples aged 40 years and older in the 10/23 experiments where the mean age was 40 years and older. For these two single study meta-analyses we used the same thresholding as for the primary GingerALE meta-analysis. We then compared the two single study meta-analyses to assess if there was greater gray matter volume reduction associated with greater body mass index in the older or younger samples. Finally, we explored if there were decreased gray matter volume regions associated with overweight that overlapped between younger and older samples using a conjunction analysis. For the conjunction analysis we used the (1) thresholded Activation likelihood estimation image generated from the single study meta-analysis with 13 experiments with younger samples, the (2) thresholded Activation likelihood estimation image from the study meta-analysis with 10 experiments with older samples, and (3) the thresholded Activation likelihood estimation image from the 23 pooled experiments. This exploratory analysis was thresholded at uncorrected  $p < .001$ , after 10,000 permutations.

### Results

Too few experiments reported that increased body mass index was associated with increased gray matter volume to subject this data to analysis. Our meta-analyses therefore focus upon the majority of experiment groups (23/25) that reported that increased body mass index is associated with decreased gray matter volume.

### *Study characteristics*

The primary analysis examined the association between increasing body mass index on decreased gray matter volume in 23 experiments. This yielded a sample of 6,788 participants (2,359 females) with an average of 202 participants ( $sd = 243$ ) per experiment group (*range* of 16 to 2,344). A total of 211,200 significant foci were reported. The average age of these 23 separate experiment groups was 38.91 ( $sd = 16.45$ ) and the average body mass index was 27.45 ( $sd = 4.01$ ), which is in the overweight range<sup>34</sup>.



The average age and the average body mass index of the 23 experiment samples were not significantly correlated (Pearson  $r = .213$ ,  $p = .329$ ), suggesting that the relationship between reduced gray matter volume and increased body mass index is not associated with age.

*Primary analysis: increased body mass index and reduced gray matter volume.*

The primary analysis was conducted on 23 experiments where decreased gray matter volume was found to be associated with increased body mass index. This meta-analysis found that overweight compared to healthy weight was associated with decreased gray matter volume in two regions in right frontal pole (Brodmann's Area 10) and right frontal medial cortex (Brodmann's Area 11), both of which are part of the right orbitofrontal cortex (see *Table 2*, *Figure 2*).

This right orbitofrontal cortex region was used as a seed in a meta-analytic connectivity analysis to identify the regions consistently reported to be active with the same seed by other papers in the Neurosynth database. *Table 3 and Figure 3* respectively list and display the network regions coactive with the right orbitofrontal cortex, Brodmann's Area and Brodmann's Area seed.

Text decoding of the network associated with decreased gray matter volume and increased body mass index using Neurosynth showed that these were positively correlated with topics associated with emotional processing, clinical symptoms and disorder, 'mentalizing', depression, emotion regulation, the default mode network, personality traits, interpersonal relationships, negative and positive valence, emotional processing, and social cognition. For the list of topics derived from the text decoding, see *Table 4*. See the *Supplementary Table* for the detailed list of terms for each topic.

*Exploratory analyses of age-dependent effects*

We explored the location(s) of gray matter volume reductions associated with greater body mass index in younger samples with an average age below 40 years. Of the 23 experiments that reported decreased gray matter volume with increased body mass indices, 13 experiments with 2,250 participants, of which 1,138 were female, reported a mean age less than 40 years. The average age of the experiments with samples less than 40 years was 27.57 years ( $sd = 7.72$ ), with an average body mass index of 26.43 years ( $sd = 4.00$ ). Of the 13 experiments where the mean age was less than 40 years, increased body mass index is associated with reduced gray matter volume in the right frontal pole, Brodmann's Area 10, see *Table 4*.

We also explored the location(s) of gray matter volume reductions associated with greater body mass index in older samples aged 40 years and older. The 10 experiments where the samples reported a mean age of 40 years and older included 4,538 participants, of which 1221 were female. The average age of the 10 of the 23 experiments with samples 40 years and older was



53.64 years ( $sd = 12.46$ ), with an average body mass index of 28.77 years ( $sd = 3.93$ ). Of the 10 experiments where the mean age is greater than or equal to 40 years, increased body mass index is associated with reduced gray matter volume in the right cerebellum crus I and II, see *Table 5*.

We then compared the two single study meta-analyses with older and younger samples to assess if there was greater gray matter volume reduction associated with greater body mass index in the younger samples or older samples. However, we did not find that there was greater gray matter volume reduction with greater body mass index in the older samples relative to the younger samples. We also did not find that there was greater gray matter volume reduction with greater body mass index with younger age relative to older age.

Finally, we explored if there was decreased gray matter volume in regions associated with overweight that overlapped between younger and older samples using a conjunction analysis. No regions of decreased gray matter volume with greater body mass index were found to overlap between younger and older samples.

## Discussion

### *Summary*

Our primary meta-analysis findings provide some of the strongest evidence to date that reduced gray matter volume in the right frontal pole (Brodmann's area 10), and right frontal medial cortex (Brodmann's area 11), both parts of the right orbitofrontal cortex, are associated with greater body mass index. The orbitofrontal cortex is coactive with networks associated with emotional regulation and processing, clinical symptoms and disorder, 'mentalizing' and social cognition, and the default mode network. We found that in younger samples increased body mass index was associated with reduced gray matter volume in the right frontal pole (Brodmann's area 10), while in older aged samples, increased body mass index was associated with reduced gray matter in the right cerebellum crus I and II.

*Reduced gray matter volume in the right orbitofrontal cortex is associated with greater body mass index.*

To date, fMRI Activation likelihood estimation meta-analyses of food taste and picture cue studies have failed to show differential activity in the right orbitofrontal cortex in overweight relative to healthy weight individuals<sup>58, 59, 60</sup>. This is despite the fact that other meta-analyses which do not examine weight status, support relationships between the orbitofrontal cortex and taste response<sup>48, 61, 62</sup> the orbitofrontal cortex and reward receipt<sup>63</sup>, and the orbitofrontal cortex and executive functioning<sup>64</sup>.

Notably, assessment of gray matter volume in the orbitofrontal cortex region is less susceptible to signal loss and possible in-scanner head motion. The blood oxygen level-dependent signal is

susceptible to magnetic field homogeneities due to the differences in magnetic susceptibility of air and tissue and can result in image distortions and signal loss in the orbitofrontal region as the orbitofrontal is close to the nasal airways. Moreover, greater body mass index has been found to be highly correlated with in-scanner motion<sup>65</sup>. In addition, structural scans are briefer and less expensive permitting generally larger sample sizes than fMRI studies, and therefore allowing for better detection of the orbitofrontal cortex in the context of a meta-analysis. Absence of fMRI meta-analytic findings supporting a relationship between orbitofrontal cortex and greater body mass index may also be due to the limited number of whole brain fMRI experiments among overweight individuals, with these meta-analyses including fewer than 20 experiments<sup>58, 59, 60</sup>. In contrast, there are more voxel-based morphometry studies, often with larger samples, suggesting that previous fMRI meta-analyses may lack the power needed to detect such effects. All of these factors may help to explain discrepancies between the meta-analytic results using fMRI versus voxel-based morphometry to assess a relationship between gray matter volume and body mass index.

While a meta-analysis provides a better powered evaluation of the size and whereabouts of the effect of increased body mass index on gray matter volume than a single study, further support for our findings come from other structural imaging studies, which could not be included in the current meta-analysis. This was due to the use of different analytic techniques or the use of different structural outcomes. A structural connectivity study examining the networks of gray and white matter structures showed that gray matter volume and cortical thickness in the bilateral orbitofrontal cortex modestly distinguishes overweight and healthy weight individuals<sup>66</sup>. Using probabilistic tractography, reduced white matter connectivity in obesity relative to healthy weight, has been observed from the right ventral anterior insula to the right medial prefrontal cortex and right medial orbitofrontal cortex to the right head of the caudate, suggesting a disruption in the neurocircuitry associated with taste and food reward processing<sup>67</sup>. Consistent with this, a taste reinforcement learning study, showed that these outcomes are associated with gray and white matter volume structure differences in the amygdala, caudate, anterior cingulate cortex, hippocampus, orbitofrontal cortex and insula in obese relative to healthy weight women<sup>44</sup>.

#### *Co-activation with the orbitofrontal cortex is linked to multiple functions.*

Using a cognitive decoding approach, which has been used to resolve debates about insula functioning and decision-making strategies<sup>57, 68</sup>, our findings show that the right orbitofrontal cortex is implicated in multiple networks including the executive control and default mode network<sup>25</sup>. Specifically, our findings showed that the right orbitofrontal cortex is coactive with networks associated with emotional regulation and processing, clinical symptoms and disorder, mentalizing and social cognition, and the default mode network. Our results showing that the right orbitofrontal cortex is associated with emotion regulation and processing and clinical symptoms and disorder fit those of previous large-scale meta-analyses. For instance, a meta-

analysis<sup>27</sup> using the Neurosynth database to parcellate the medial frontal cortex showed that the anterior zone, which includes Brodmann's Area 10 and Brodmann's Area 11, is associated with affective processing, including fear processing. Another large-scale meta-analysis using experiments from the Brainmap database<sup>69</sup> showed that Brodmann's Area 10 is associated with attention to emotionally salient information. Consistent with this, a meta-analytic connectivity modeling study<sup>29</sup> showed that that medial orbitofrontal cortex, which includes Brodmann's Area 10 and 11, was coactive with the ventral striatum, amygdala and hippocampus. Finally, our findings are consistent with another large scale meta-analysis of human fMRI studies showing that the medial prefrontal area is associated with disorders including eating disorders, depression and smoking<sup>70</sup>.

Our findings are also consistent with previous meta-analyses showing that Brodmann's Area 10 and Brodmann's Area 11 are coactive with regions associated with the default mode network such as the angular gyrus, and posterior cingulate cortex as well as with the amygdala and ventral striatum<sup>27, 29</sup>. The default mode network appears active when an individual is at rest and is thought to be engaged during self-reflection, for instance of one's emotions, and during social cognition<sup>71, 72</sup>. The meta-analysis by De la Vega et al.,<sup>27</sup> has also shown that the anterior orbitofrontal cortex is associated with social-cognitive processing or 'mentalizing'. Although resting state findings in obesity are mixed, the largest study to date<sup>73</sup> showed that higher body mass index was associated with lower default mode functional connectivity in the posterior cingulate cortex and precuneus, suggesting the potential importance of parts of the default mode network in obesity.

#### *Age-dependent meta-analytic findings*

Reduced gray matter volume in the right orbitofrontal cortex was associated greater body mass index among younger samples, whereas reduced gray matter volume in cerebellum crus I and II were associated with greater body mass index among older samples. However, the number of studies included in each of these groups were relatively small making it difficult to interpret this distinction in a meaningful way. These findings differ from those of a previous systematic review<sup>30</sup> which found that studies with older samples showed associations between greater adiposity and parietal and temporal gray matter atrophy, whereas studies with samples 40 years and younger revealed mixed findings for reductions in gray matter in the temporal lobe. The relation between body mass index and gray matter volume differed in the different age groups. Notably, these regions did not overlap, suggesting that age may moderate the effect of body mass index on the brain. The relation between body mass index and the orbitofrontal cortex was not observed in the older sample, although it was observed in the younger sample. However, these results should be interpreted cautiously as these analyses were underpowered.

#### *Limitations and future directions*

The quality of a meta-analysis is as only good as the quality of studies that are included. For instance, large-scale meta-analyses may inadvertently include studies reporting region of interest analyses. The findings from meta-analyses are not experimental or longitudinal. Theorizing why gray matter volume in the right orbitofrontal cortex may be reduced in individuals with a higher body mass index is speculative without longitudinal evidence to assess whether these differences are seen prior to weight gain or occur as a result of weight gain. As mentioned, there were too few studies examining both age and body mass index to allow us to make firm conclusions regarding age. Some studies controlled for total intracranial volume and for sex while others did not, with control of these variables important in the more precise assessment of gray matter volume<sup>74,75</sup>. A limitation of the primary meta-analysis is that we could only analyze the relationship between reduced gray matter volume and obesity as there were not enough studies examining increased gray matter volume and obesity. Future studies are needed that use fat-free mass, fat mass or waist circumference as opposed to body mass index as outcomes.

### *Conclusion*

Our findings are important in providing evidence of the relationship between decreased gray matter volume in the right orbitofrontal cortex and obesity using a meta-analysis of voxel-based morphometry studies. Assessment of gray matter volume using is less susceptible to signal loss and possibly in-scanner head motion. Structural scans assessing gray matter volume are briefer, cheaper and voxel-based morphometry studies are therefore typically larger than functional magnetic resonance imaging studies, allowing for better detection of the orbitofrontal cortex in the context of a meta-analysis. Possibly, for these reasons, the current meta-analysis using gray matter volume data provides clear evidence of the importance of the orbitofrontal cortex in human obesity. Future research is needed to explain the possible functional significance of reduced gray matter volume in the orbitofrontal cortex in overweight relative to lean individuals, and to assess changes in gray matter volume with weight change longitudinally.

*Figure 1:* Preferred Reporting Items for Systematic Reviews and Meta-Analyses Flow Diagram for gray matter volume

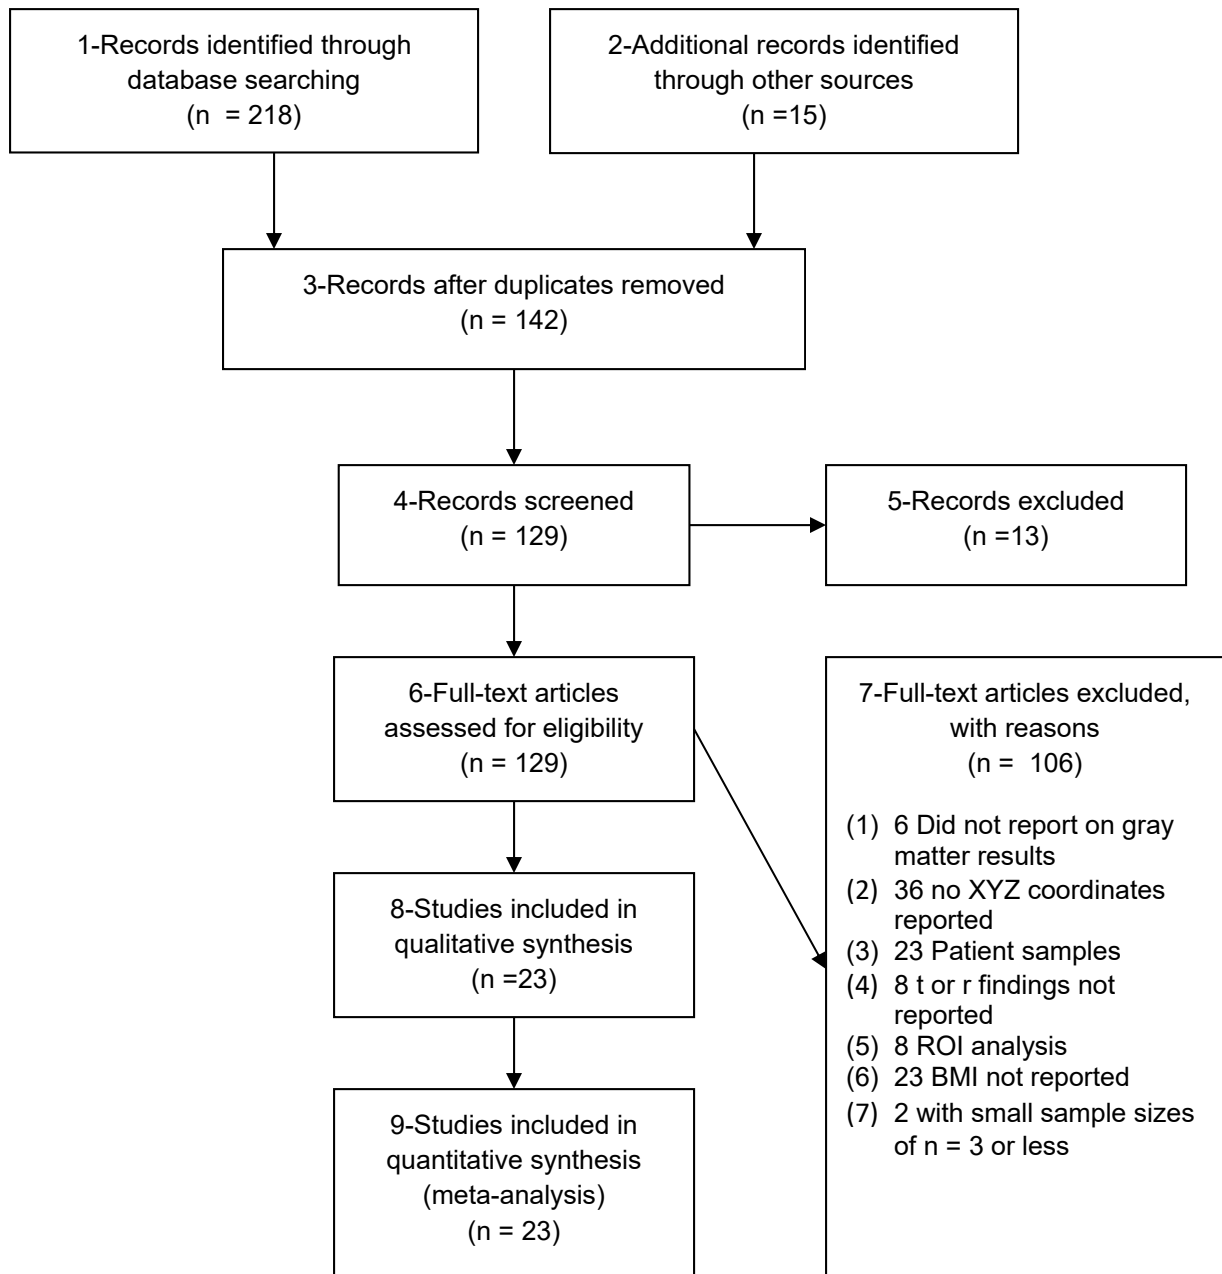

*Figure 2:* Increased body mass index is associated with reduced gray matter volume in the right frontal pole and frontal medial cortex (Brodmann's areas 10 and 11) in 23 experiments, using GingerALE.

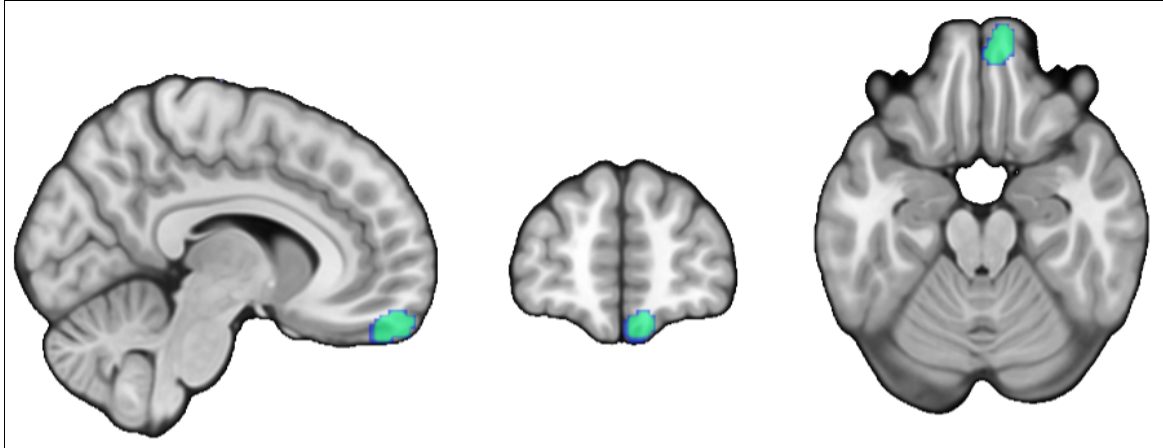

*Note:* The critical cluster threshold was  $p < .05$  (corrected for multiple comparisons), with a cluster-forming threshold of  $p < .001$  (uncorrected). This is presented in neurological orientation at these Montreal Neurological Institute coordinates of  $x = 8, y = 56, z = -22$ .

*Figure 3:* Network correlated with the regions associated with reduced gray matter volume and body mass index, the right frontal pole and right frontal medial cortex (Brodmann's area 10 and 11).

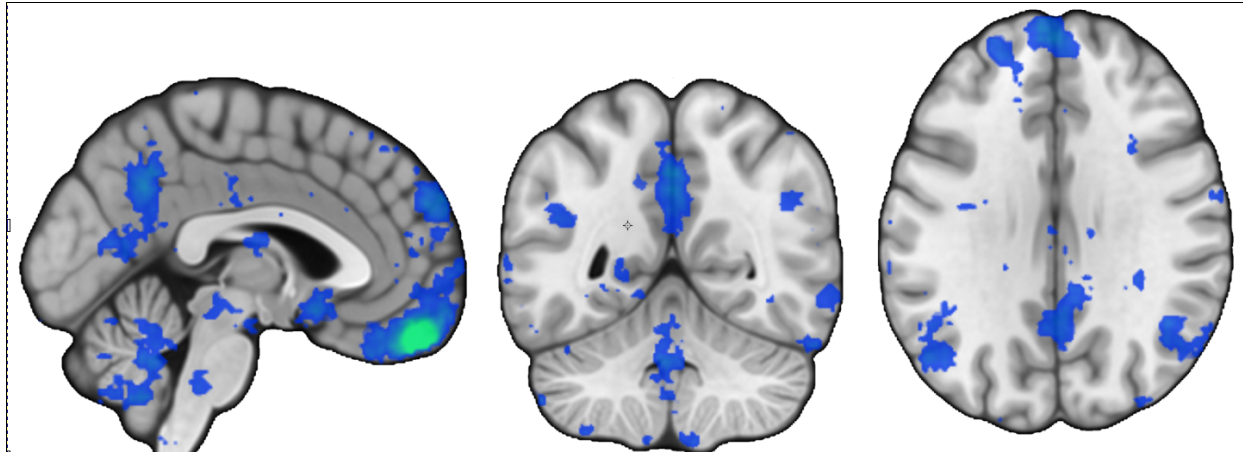

*Note:* This displays the findings from the network coactivation analysis of the Neurosynth database and uses the thresholded specificity\_z map (where  $FDR\ q < .01$ ) where the number of voxels was 100 or more. Presented here in neurological orientation are slices at the Montreal Neurological Institute coordinates of  $x = -2$ ,  $y = -53$  and  $z = 29$ . See *Table 3* for the accompanying listing of regions presented.



**Table 1** experiments with gray matter volume findings

| Paper | Expts | Author Date                     | Sample                                         | Body mass index m (sd)                | Female            | Age m (sd)                            | No. of Foci | T/Z/r | P values         |
|-------|-------|---------------------------------|------------------------------------------------|---------------------------------------|-------------------|---------------------------------------|-------------|-------|------------------|
| 1     | 1     | Bond 2014                       | 55 healthy subjects                            | 24.00 (3.90)                          | 24                | 22.15 (3.65)                          | 4,200       | r     | p FWE < .05      |
| 2     | 2     | Brooks 2013 <sup>78</sup>       | (1) 59 obese BMI ≥ 30<br>(2) 97 lean BMI < 25  | (1) 33.7 (0.4);<br>(2) 22.1 (0.2)     | (1) 58;<br>(2) 54 | (1) 75 (NA);<br>(2) 75 (NA)           | 59          | T     | p FWE < .05      |
| 3     | 3     | He 2015 <sup>43</sup>           | 336 Chinese students                           | 20.40 (2.20)                          | 195               | 20.38 (1.00)                          | 738         | r     | p < .01 uncor    |
| 4     | 4     | Honea 2016 <sup>79</sup>        | 53/72 successful dieters                       | 35.60 (3.60)                          | 34                | 40.10 (8.5)                           | 2           | r     | p FWE < .05      |
| 5     | 5     | Horstmann 2011 <sup>35</sup>    | 61 healthy females                             | 26.15 (6.64)                          | 61                | 25.11 (4.43)                          | 2           | Z & r | p < 0.0001 uncor |
| 5     | 6     | Horstmann 2011 <sup>35</sup>    | 61 healthy males                               | 27.24 (6.13)                          | 61                | 25.46 (4.25)                          | 1           | Z & r | p < 0.0002 uncor |
| 6     | 7     | Janowitz 2015 <sup>80</sup>     | 758 SHIP-2 sample                              | 27.40 (4.50)                          | 408               | 49.80 (9.30)                          | 55,032      | r     | p FWE < .05      |
| 7     | 8     | Karlsson 2013 <sup>81</sup>     | (1) 23 severely obese;<br>(2) 22 normal-weight | (1) 43.17 (3.74);<br>(2) 24.02 (2.28) | (1) 18;<br>(2) 15 | (1) 47.30 (8.90);<br>(2) 46.45 (9.45) | NA          | r     | p FWE < .05      |
| 8     | 9     | Kennedy 2016 <sup>41</sup>      | 137 adolescents                                | 20.45 <sup>a</sup>                    | 68                | 14.89 (3.10)                          | 18,593      | r     | p FWE < .05      |
| 9     | 10    | Kurth 2013 <sup>82</sup>        | 115 overweight                                 | 25.02 (4.13)                          | 61                | 45.17 (15.45)                         | 27,995      | r     | p FDR < 0.05     |
| 10    | 11    | Masouleh 2016 <sup>83</sup>     | 614 older adults                               | 27.50 (4.00)                          | 258               | 68.70 (4.60)                          | 39,998      | r     | p FDR < 0.05     |
| 11    | 12    | Mathar 2016 <sup>84</sup>       | (1) 23 lean;<br>(2) 19 obese                   | (1) 21.75 (1.30);<br>(2) 33.55 (2.30) | (1) 12;<br>(2) 8  | (1) 25.20 (3.00);<br>(2) 27.00 (4.05) | 3,225       | Z     | p FWE < .05      |
| 12    | 13    | Mueller 2015 <sup>85</sup>      | 16 obese/overweight                            | 33.60 (5.90)                          | 9                 | 27.20 (6.70)                          | 2           | r     | p FWE < .05      |
| 13    | 14    | Nouwen 2017 <sup>42</sup>       | (1) 20 obese and<br>(2) 19 healthy weight      | 30.25                                 | (1) 15;<br>(2) 14 | (1) 14.9 (2.0);<br>(2) 16.4 (1.7)     | 2,894       | Z     | p < .005 uncor   |
| 14    | 15    | Opel 2015 <sup>86</sup>         | 141 healthy adults                             | 25.74 (4.7)                           | 78                | 37.59 (11.78)                         | 1,128       | r     | p FWE < .05      |
| 15    | 16    | Opel <sup>46</sup> -BiDirect    | 347 healthy adults                             | 26.30 (4.1)                           | 155               | 51.60 (8.2)                           | 11,751      | T & r | p FWE < .05      |
| 15    | 17    | Opel-2017 <sup>46</sup> -MNC    | 330 healthy adults                             | 24.50 (3.9)                           | 172               | 39.20 (11.3)                          | 1,462       | T & r | p FWE < .05      |
| 16    | 18    | Pannacciulli 2006 <sup>36</sup> | (1) 24 obese;<br>(2) 36 lean                   | 39.40 (4.7);<br>22.7 (2.2)            | 24                | (1) 32.00 (8.0);<br>(2) 33 (9.0)      | 2,922       | r     | p < .01 uncor    |
| 17    | 19    | Shott 2015 <sup>44</sup>        | (1) 18 obese;<br>(2) 24 healthy controls       | 34.78 (4.44);<br>21.64 (1.26)         | 42                | (1) 28.67 (8.30);<br>(2) 27.42 (6.28) | 581         | T/Z   | p FWE < .05      |
| 18    | 20    | Smucny 2012 <sup>87</sup>       | (1) 28 obese-prone;<br>(2) 25 obese-resistant  | 26.19 (2.90);<br>20.96 (1.99)         | 26                | (1) 30.29 (3.81);<br>(2) 31.32 (3.45) | NA          | T     | P < 0.001 uncor  |
| 19    | 21    | Taki 2008 <sup>37</sup>         | 690 Japanese men                               | 23.41 (3.00)                          | 0                 | 44.50 (16.1)                          | NA          | r     | P < 0.001 uncor  |
| 20    | 22    | Tuulari, in press <sup>88</sup> | (1) 29 normal weight;<br>(2) 47 severely obese | 23.20 (2.8);<br>42.20 (4.0)           | 65                | (1) 45.90 (11.8);<br>(2) 44.9 (9.0)   | 31          | r     | P < .05 uncor    |
| 21    | 23    | Walther 2010 <sup>45</sup>      | 95 overweight women                            | 28.30 (2.10)                          | 95                | 69.30 (9.30)                          | 32,208      | r     | p FDR < 0.05     |
| 22    | 24    | Weise 2017 <sup>38</sup>        | 875 healthy                                    | 26.60 (5.3)                           | 489               | 28.80 (3.7)                           | 2,005       | r     | p FWE < .05      |
| 23    | 25    | Yao <sup>39</sup>               | 109 healthy adults                             | 27.58 (6.05)                          | 62                | 35.15 (11.24)                         | 6,374       | r     | p < .001 uncor   |

Note: BMI = body mass index, NA = not available; <sup>a</sup> Reported 59.36 (26.87) %ile which is a healthy BMI given age. Here we calculated the body mass index equivalent using US growth charts <sup>76</sup>. <sup>b</sup> Reported (1) 3.25 (0.78) %ile of 95th percentile and (2) 0.23 (0.96). Here we calculated the mean body mass index of both groups using UK growth charts <sup>77</sup>





*Table 2:* In 23 experiments, increased body mass index is associated with reduced gray matter volume in the right orbitofrontal cortex, Brodmann's area 10 and 11, in the GingerALE analysis.

| Reduced gray matter volume in overweight relative to healthy weight (23 experiments) |      |    |    |     |    |                           |               |
|--------------------------------------------------------------------------------------|------|----|----|-----|----|---------------------------|---------------|
| Label                                                                                | Side | x  | y  | z   | BA | Volume (mm <sup>3</sup> ) | Extrema Value |
| Frontal pole                                                                         | R    | 10 | 58 | -22 | 10 | 1136                      | 3.07E-02      |
| Frontal medial cortex                                                                | R    | 6  | 52 | -24 | 11 | Part of above             | 2.86E-02      |

*Note:* The critical cluster threshold was  $p FWE < .05$ , with a voxel-wise threshold of  $p$  uncorrected  $< .001$ , after 1000 permutations. BA = Brodmann Area; x, y, z are in Montreal Neurological Institute coordinates. Labels use the Harvard-Oxford Cortical Structural Atlas from the FSL program.

*Table 3:* Regions consistently reported to be active using the right orbitofrontal cortex (Brodmann’s areas 10 and 11) seed by other papers in the Neurosynth database.

| Label                             | Side | x   | y   | z   | BA | Volume (Voxels) | Z Maxima |
|-----------------------------------|------|-----|-----|-----|----|-----------------|----------|
| Frontal medial cortex             | R    | 4   | 48  | -28 |    | 10,981          | 33.1     |
| Inferior temporal gyrus posterior | R    | -48 | -8  | -40 | 20 | 1,731           | 10.1     |
| Precuneus                         |      | 0   | -56 | 40  | 31 | 835             | 9.12     |
| Middle temporal gyrus posterior   | R    | -62 | -16 | -24 | 21 | 447             | 7.74     |
| Lateral occipital cortex superior | R    | -50 | -70 | 26  | 19 | 441             | 7.18     |
| Cerebellum crus I                 | L    | 48  | -68 | -42 |    | 370             | 7.97     |
| Angular gyrus                     | L    | 44  | -56 | 32  | 39 | 245             | 6.56     |
| Superior frontal gyrus            | L    | 22  | 30  | 44  | 8  | 168             | 6.37     |
| Cerebellum crus II                | R    | -22 | -86 | -40 |    | 158             | 7.8      |

*Note:* This lists the findings from the network coactivation analysis of the Neurosynth database and uses the thresholded specificity<sub>z</sub> map (where  $FDR\ q < .01$ ) where the number of voxels was 100 or more. BA = Brodmann Area; x, y, z are in Montreal Neurological Institute coordinates. Labels use the Harvard-Oxford Cortical Structural Atlas and the Cerebellar Atlas in MNI152 space after normalization with FNIRT from the FSL program.

*Table 4:* The 10 largest positive meta-analytic coactivation  $r$  values yielded from the decoding analysis using 400 topics (Poldrack et al., 2012) in the Neurosynth database for the networks associated with reduced gray matter volume and overweight for all 23 experiments.

| Positive $r$ |                                   | $r$    |
|--------------|-----------------------------------|--------|
| 1            | 40 faces emotional fearful        | 0.1828 |
| 2            | 204 disorders clinical symptoms   | 0.1875 |
| 3            | 269 mental mentalizing social     | 0.1924 |
| 4            | 253 depression mdd depressive     | 0.1951 |
| 5            | 277 emotion regulation emotional  | 0.2008 |
| 6            | 337 dmn network default           | 0.2078 |
| 7            | 101 personality traits trait      | 0.2152 |
| 8            | 223 negative positive valence     | 0.224  |
| 9            | 150 emotional processing neutral  | 0.2676 |
| 10           | 374 social cognition participants | 0.2801 |

Note: See Supplementary Table for the detailed list of terms for each topic.

*Table 5:* In 13 experiments of samples with a mean age less than 40 years, increased body mass index is associated with reduced gray matter volume in the right frontal pole, Brodmann's area (BA) 10, in the GingerALE analysis.

| Reduced gray matter volume in overweight relative to healthy weight (13 experiments) |      |    |    |     |    |                           |               |
|--------------------------------------------------------------------------------------|------|----|----|-----|----|---------------------------|---------------|
| Label                                                                                | Side | x  | y  | z   | BA | Volume (mm <sup>3</sup> ) | Extrema Value |
| Frontal pole                                                                         | R    | 10 | 58 | -22 | 10 | 800                       | 2.34E-02      |

*Note:* The critical cluster threshold was  $p < .05$ , with a voxel-wise threshold of  $p$  uncorrected  $< .001$ , after 1000 permutations. BA = Brodmann Area; x, y, z are in Montreal Neurological Institute coordinates. Labels use the Harvard-Oxford Cortical Structural Atlas from the FSL program.



*Table 6:* In 10 experiments of samples with a mean age greater than or equal to 40 years, increased body mass index is associated with reduced gray matter volume in the right Cerebellum Crus I and II, in the GingerALE analysis.

| Reduced gray matter volume in overweight relative to healthy weight (10 experiments) |      |    |     |     |    |                           |          |
|--------------------------------------------------------------------------------------|------|----|-----|-----|----|---------------------------|----------|
| Label                                                                                | Side | x  | y   | z   | BA | Volume (mm <sup>3</sup> ) |          |
| Cerebellum Crus I                                                                    | R    | 34 | -66 | -36 |    | 704                       | 1.73E-02 |
| Cerebellum Crus II                                                                   | R    | 28 | -68 | -40 |    | Part of above             | 1.89E-02 |

Note: *Note:* The critical cluster threshold was  $p < .05$ , with a voxel-wise threshold of  $p$  uncorrected  $< .001$ , after 1000 permutations. BA = Brodmann Area; x, y, z are in Montreal Neurological Institute coordinates. Labels use the Cerebellar Atlas in MNI152 space after normalization with FNIRT from the FSL program.

*Supplementary Table*

|   | Topic #s | Topic terms                                                                                                                                                                                                                                                                                                                                                                                                                                                          | # studeits |
|---|----------|----------------------------------------------------------------------------------------------------------------------------------------------------------------------------------------------------------------------------------------------------------------------------------------------------------------------------------------------------------------------------------------------------------------------------------------------------------------------|------------|
| 1 | 040      | faces, emotional, fearful, happy, neutral, face, sad, angry, processing, response, emotion, facial, expressions, relative, fear, trustworthiness, emotionally, viewing, gender, affective, threat, salient, masked, expression, valence, bias, houses, authenticity, presentation, blocks, responsiveness, reactivity, content, responsivity, rated, expressive, rapid, bdd, implicit, enhance                                                                       | 252        |
| 2 | 204      | disorders, clinical, symptoms, psychiatric, disorder, severity, symptom, abnormalities, neuropsychiatric, contribute, characterized, individuals, conclusions, neurobiological, reported, implicated, pathophysiology, functioning, alterations, dysfunction, regional, neurological, severe, increased, illness, sample, circuits, diagnosis, development, populations, potential, population, abnormal, recently, medical, disease, free, core, expression, scores | 333        |
| 3 | 269      | mental, mentalizing, social, belief, mind, junction, beliefs, theory, attribution, reasoning, inference, intentions, ability, person, people, understanding, agents, inferring, inferences, perceivers, infer, false, stories, cognition, character, agent, intentional, chewing, terms, paracingulate, attribute, understand, desires, predict, cartoon, cognitive, intentionality, poles, recruited, implied                                                       | 222        |
| 4 | 253      | depression, mdd, depressive, depressed, major, fc, disorder, healthy, conclusions, symptoms, antidepressant, increased, medication, mood, severity, controls, remitted, limitations, rumination, episode, illness, unipolar, decreased, abnormalities, naive, risk, abnormal, unmedicated, treatment, subgenual, pathophysiology, episodes, antidepressants, vulnerability, history, current, symptom, rmdd, alterations, remission                                  | 304        |
| 5 | 277      | emotion, regulation, emotional, negative, emotions, affect, affective, regulate, regulatory, processing, reactivity, reported, pictures, responses, regulating, circuitry, implicated, impact, reduced, reactions, aversive, viewed, healthy, amygdalae, regulated, modulation, viewing, instructed, appraisal, twenty, emotionally, attenuate, feel, decrease, amy, instructions, stress, female, maintain, style                                                   | 220        |
| 6 | 337      | dmn, network, default, mode, sn, connectivity, resting, independent, component, networks, rest, icns, intrinsic, subsystems, fpn, tpn, salience, exhibited, phg, referential, ica, subsystem, core, ccn, smn, intra, mental, anticorrelation, node, subnetworks, rai, internal, tcn, anticorrelations, inter, vmax, coherent, internetwork, hubs, edp                                                                                                                | 201        |
| 7 | 101      | personality, traits, trait, neuroticism, extraversion, pws, individual, individuals, bladder, factor, healthy, floor, schizotypal, micturition, scoring, associations,                                                                                                                                                                                                                                                                                               | 126        |

|    |     |                                                                                                                                                                                                                                                                                                                                                                                                                                                                    |     |
|----|-----|--------------------------------------------------------------------------------------------------------------------------------------------------------------------------------------------------------------------------------------------------------------------------------------------------------------------------------------------------------------------------------------------------------------------------------------------------------------------|-----|
|    |     | schizotypy, questionnaire, model, correlates, scores, dimensions, agreeableness, antisocial, dimension, facet, neo, factors, harm, inventory, temperament, filling, spq, openness, proneness, emotion, conscientiousness, character, urge, eysenck                                                                                                                                                                                                                 |     |
| 8  | 223 | negative, positive, valence, emotional, affect, neutral, affective, responses, increased, relative, current, responding, emotions, valenced, response, affirmative, affectivity, exaggerated, affectively, report, valences, hedonic, schedule, experiences, amygdalar, disengage, labeled, ast, caption, enhancing, underpinnings, evocative, quadratic, rain, neurally, differed, blunting, researches, continues, behaviourally                                 | 271 |
| 9  | 150 | emotional, processing, neutral, emotion, arousal, valence, affective, emotionally, enhanced, content, emotions, structures, intensity, salient, ratings, response, emotionality, salience, presentation, appraisal, participants, reactivity, reactions, arousing, evaluation, impact, valenced, scenes, rating, attenuated, amygdalar, charged, regulation, feelings, dimensions, laden, implicated, interactions, aversive, pleasure                             | 379 |
| 10 | 374 | social, cognition, participants, exclusion, interaction, interactions, socially, people, interpersonal, rejection, behavior, individual, nonsocial, relationships, implicated, situations, socio, evaluations, affiliation, affiliative, mentalizing, sensitivity, friends, experiences, emotional, competence, isolation, excluded, personal, individuals, distress, game, friend, describing, evaluation, participant, contexts, junction, sociality, psychology | 275 |

## References

1. Kringelbach ML. The human orbitofrontal cortex: linking reward to hedonic experience. *Nature Reviews Neuroscience*. 2005;6(9):691-702.
2. Rolls ET. Taste, olfactory, and food reward value processing in the brain. *Progress in Neurobiology*. 2015;127:64-90.
3. Rolls ET. Functions of the anterior insula in taste, autonomic, and related functions. *Brain and Cognition*. 2016;110:4-19.
4. Rolls ET. Reward systems in the brain and nutrition. *Annual review of nutrition*. 2016;36:435-470.
5. Small DM. Flavor is in the brain. *Physiology & behavior*. 2012.
6. Small DM. Taste representation in the human insula. *Brain structure & function*. 2010;214(5-6):551-561.
7. Small DM, Bender G, Veldhuizen MG, Rudenga K, Nachtigal D, Felsted J. The role of the human orbitofrontal cortex in taste and flavor processing. In: Schoenbaum G, Gottfried JA, Murray EA, Ramus SJ, eds. *Linking Affect to Action: Critical Contributions of the Orbitofrontal Cortex*. Vol 11212007:136-151.
8. Rolls ET, Yaxley S, Sienkiewicz ZJ. Gustatory responses of single neurons in the caudolateral orbitofrontal cortex of the macaque monkey. *Journal of neurophysiology*. 1990;64(4):1055-1066.
9. Critchley HD, Rolls ET. Hunger and satiety modify the responses of olfactory and visual neurons in the primate orbitofrontal cortex. *Journal of neurophysiology*. 1996;75(4):1673-1686.
10. Kringelbach ML, O'Doherty J, Rolls ET, Andrews C. Activation of the human orbitofrontal cortex to a liquid food stimulus is correlated with its subjective pleasantness. *Cerebral Cortex*. 2003;13(10):1064-1071.
11. Rolls ET, Sienkiewicz ZJ, Yaxley S. Hunger modulates the responses to gustatory stimuli of single neurons in the caudolateral orbitofrontal cortex of the macaque monkey. *European Journal of Neuroscience*. 1989;1(1):53-60.
12. Rolls ET, Treves A. The neuronal encoding of information in the brain. *Prog Neurobiol*. 2011;95(3):448-490.
13. Schoenbaum G, Roesch MR, Stalnaker TA, Takahashi YK. A new perspective on the role of the orbitofrontal cortex in adaptive behaviour. *Nature Reviews Neuroscience*. 2009;10(12):885.
14. Schoenbaum G, Esber GR. How do you (estimate you will) like them apples? Integration as a defining trait of orbitofrontal function. *Curr Opin Neurobiol*. 2010;20(2):205-211.
15. Rolls E. Understanding the mechanisms of food intake and obesity. *Obesity reviews*. 2007;8(s1):67-72.
16. Rolls ET. The orbitofrontal cortex and emotion in health and disease, including depression. *Neuropsychologia*. 2017.
17. Yang Y, Shields GS, Guo C, Liu Y. Executive function performance in obesity and overweight individuals: A meta-analysis and review. *Neuroscience & Biobehavioral Reviews*. 2017.

18. Emery RL, Levine MD. Questionnaire and behavioral task measures of impulsivity are differentially associated with body mass index: A comprehensive meta-analysis. *Psychological bulletin*. 2017;143(8):868.
19. Lavagnino L, Arnone D, Cao B, Soares JC, Selvaraj S. Inhibitory control in obesity and binge eating disorder: A systematic review and meta-analysis of neurocognitive and neuroimaging studies. *Neuroscience and biobehavioral reviews*. 2016;68:714-726.
20. Lavagnino L, Mwangi B, Bauer IE, et al. Reduced inhibitory control mediates the relationship between cortical thickness in the right superior frontal gyrus and body mass index. *Neuropsychopharmacology*. 2016;41(9):2275.
21. Batterink L, Yokum S, Stice E. Body mass correlates inversely with inhibitory control in response to food among adolescent girls: An fMRI study. *NeuroImage*. 2010;52(4):1696-1703.
22. McClelland J, Dalton B, Kekic M, Bartholdy S, Campbell IC, Schmidt U. A systematic review of temporal discounting in eating disorders and obesity: Behavioural and neuroimaging findings. *Neuroscience & Biobehavioral Reviews*. 2016;71:506-528.
23. Stojek MM, MacKillop J. Relative reinforcing value of food and delayed reward discounting in obesity and disordered eating: a systematic review. *Clinical psychology review*. 2017;55:1-11.
24. Barrett LF, Satpute AB. Large-scale brain networks in affective and social neuroscience: towards an integrative functional architecture of the brain. *Current opinion in neurobiology*. 2013;23(3):361-372.
25. Smith DV, Sip KE, Delgado MR. Functional connectivity with distinct neural networks tracks fluctuations in gain/loss framing susceptibility. *Human Brain Mapping*. 2015;36(7):2743-2755.
26. van den Heuvel MP, Sporns O. Network hubs in the human brain. *Trends in cognitive sciences*. 2013;17(12):683-696.
27. de la Vega A, Chang LJ, Banich MT, Wager TD, Yarkoni T. Large-scale meta-analysis of human medial frontal cortex reveals tripartite functional organization. *Journal of Neuroscience*. 2016;36(24):6553-6562.
28. de la Vega A, Yarkoni T, Wager TD, Banich MT. Large-scale Meta-analysis Suggests Low Regional Modularity in Lateral Frontal Cortex. *Cerebral Cortex*. 2017:1-15.
29. Zald DH, McHugo M, Ray KL, Glahn DC, Eickhoff SB, Laird AR. Meta-analytic connectivity modeling reveals differential functional connectivity of the medial and lateral orbitofrontal cortex. *Cerebral cortex*. 2012;24(1):232-248.
30. Willette AA, Kapogiannis D. Does the brain shrink as the waist expands? *Ageing Res Rev*. 2015;20:86-97.
31. Minkova L, Habich A, Peter J, Kaller CP, Eickhoff SB, Klöppel S. Gray matter asymmetries in aging and neurodegeneration: A review and meta-analysis. *Human brain mapping*. 2017;38(12):5890-5904.
32. Tromp D, Dufour A, Lithfous S, Pebayle T, Després O. Episodic memory in normal aging and Alzheimer disease: Insights from imaging and behavioral studies. *Ageing research reviews*. 2015;24:232-262.
33. Raz N, Rodrigue KM. Differential aging of the brain: patterns, cognitive correlates and modifiers. *Neuroscience & Biobehavioral Reviews*. 2006;30(6):730-748.

34. CDC. Interpretation of BMI for adults. 2010; [http://www.cdc.gov/healthyweight/assessing/bmi/adult\\_bmi/index.html](http://www.cdc.gov/healthyweight/assessing/bmi/adult_bmi/index.html). PMID & NIMHSID not available. Accessed 5-27-2010, 2010.
35. Horstmann A, Busse FP, Mathar D, et al. Obesity-Related Differences between Women and Men in Brain Structure and Goal-Directed Behavior. *Front Hum Neurosci*. 2011;5.
36. Pannacciulli N, Del Parigi A, Chen K, Le DS, Reiman EM, Tataranni PA. Brain abnormalities in human obesity: a voxel-based morphometric study. *Neuroimage*. 2006;31(4):1419-1425.
37. Taki Y, Kinomura S, Sato K, et al. Relationship between body mass index and gray matter volume in 1,428 healthy individuals. *Obesity (Silver Spring)*. 2008;16(1):119-124.
38. Weise CM, Piaggi P, Reinhardt M, et al. The obese brain as a heritable phenotype—A combined morphometry and twin study. *International journal of obesity (2005)*. 2017;41(3):458.
39. Yao L, Li W, Dai Z, Dong C. Eating behavior associated with gray matter volume alternations: A voxel based morphometry study. *Appetite*. 2016;96:572-579.
40. Eickhoff SB, Nichols TE, Laird AR, et al. Behavior, sensitivity, and power of activation likelihood estimation characterized by massive empirical simulation. *Neuroimage*. 2016;137:70-85.
41. Kennedy JT, Collins PF, Luciana M. Higher Adolescent Body Mass Index is Associated with Lower Regional Gray and White Matter Volumes and Lower Levels of Positive Emotionality. *Frontiers in Neuroscience*. 2016;10.
42. Nouwen A, Chambers A, Chechlacz M, et al. Microstructural abnormalities in white and gray matter in obese adolescents with and without type 2 diabetes. *NeuroImage: Clinical*. 2017;16:43-51.
43. He Q, Chen C, Dong Q, et al. Gray and white matter structures in the midcingulate cortex region contribute to body mass index in Chinese young adults. *Brain Structure and Function*. 2015;220(1):319-329.
44. Shott ME, Cornier M-A, Mittal VA, et al. Orbitofrontal cortex volume and brain reward response in obesity. *International journal of obesity*. 2015;39(2):214-221.
45. Walther K, Birdsill AC, Glisky EL, Ryan L. Structural brain differences and cognitive functioning related to body mass index in older females. *Hum Brain Mapp*. 2010;31(7):1052-1064.
46. Opel N, Redlich R, Kaehler C, et al. Prefrontal gray matter volume mediates genetic risks for obesity. *Molecular psychiatry*. 2017.
47. Lancaster JL, Tordesillas-Gutiérrez D, Martinez M, et al. Bias between MNI and Talairach coordinates analyzed using the ICBM-152 brain template. *Human brain mapping*. 2007;28(11):1194-1205.
48. Veldhuizen MG, Albrecht J, Zelano C, Boesveldt S, Breslin P, Lundström JN. Identification of human gustatory cortex by activation likelihood estimation. *Human brain mapping*. 2011;32(12):2256-2266.
49. Huerta CI, Sarkar PR, Duong TQ, Laird AR, Fox PT. Neural bases of food perception: Coordinate-based meta-analyses of neuroimaging studies in multiple modalities. *Obesity*. 2014;22(6):1439-1446.
50. Turkeltaub PE, Eden GF, Jones KM, Zeffiro TA. Meta-analysis of the functional neuroanatomy of single-word reading: method and validation. *Neuroimage*. 2002;16(3):765-780.



51. Eickhoff SB, Laird AR, Grefkes C, Wang LE, Zilles K, Fox PT. Coordinate-based activation likelihood estimation meta-analysis of neuroimaging data: A random-effects approach based on empirical estimates of spatial uncertainty. *Human brain mapping*. 2009;30(9):2907-2926.
52. Turkeltaub PE, Eickhoff SB, Laird AR, Fox M, Wiener M, Fox P. Minimizing within-experiment and within-group effects in activation likelihood estimation meta-analyses. *Human brain mapping*. 2012;33(1):1-13.
53. Eickhoff SB, Laird AR, Fox PM, Lancaster JL, Fox PT. Implementation errors in the GingerALE Software: Description and recommendations. *Human brain mapping*. 2017;38(1):7-11.
54. Muller VI, Cieslik EC, Laird AR, et al. Ten simple rules for neuroimaging meta-analysis. *Neuroscience and biobehavioral reviews*. 2018;84:151-161.
55. Yarkoni T, Poldrack RA, Nichols TE, Van Essen DC, Wager TD. Large-scale automated synthesis of human functional neuroimaging data. *Nature methods*. 2011;8(8):665-670.
56. Poldrack RA, Mumford JA, Schonberg T, Kalar D, Barman B, Yarkoni T. Discovering Relations Between Mind, Brain, and Mental Disorders Using Topic Mapping. *PLoS Comput Biol*. 2012;8(10).
57. Chang LJ, Yarkoni T, Khaw MW, Sanfey AG. Decoding the Role of the Insula in Human Cognition: Functional Parcellation and Large-Scale Reverse Inference. *Cereb Cortex*. 2013;23(3):739-749.
58. García-García I, Horstmann A, Jurado MA, et al. Reward processing in obesity, substance addiction and non-substance addiction. *obesity reviews*. 2014;15(11):853-869.
59. Kennedy J, Dimitropoulos A. Influence of feeding state on neurofunctional differences between individuals who are obese and normal weight: A meta-analysis of neuroimaging studies. *Appetite*. 2014;75:103-109.
60. Brooks SJ, Cedernaes J, Schioth HB. Increased Prefrontal and Parahippocampal Activation with Reduced Dorsolateral Prefrontal and Insular Cortex Activation to Food Images in Obesity: A Meta-Analysis of fMRI Studies. *PloS one*. 2013;8(4).
61. Huerta CI, Sarkar PR, Duong TQ, Laird AR, Fox PT. Neural bases of food perception: Coordinate-based meta-analyses of neuroimaging studies in multiple modalities. *Obesity (Silver Spring)*. 2014;22(6):1439-1446.
62. Yeung Andy Wai Kan., Goto Tazuko K., Keung LW. Basic taste processing recruits bilateral anteroventral and middle dorsal insulae: An activation likelihood estimation meta-analysis of fMRI studies. *Brain and Behavior*. 2017;7(4):e00655.
63. Stuart O, Carsten M, Alex F, George Y, Murat Y, Valentina L. The anticipation and outcome phases of reward and loss processing: A neuroimaging meta-analysis of the monetary incentive delay task. *Human Brain Mapping*. 0(0).
64. Yuan P, Raz N. Prefrontal cortex and executive functions in healthy adults: a meta-analysis of structural neuroimaging studies. *Neuroscience & Biobehavioral Reviews*. 2014;42:180-192.
65. Siegel JS, Mitra A, Laumann TO, et al. Data quality influences observed links between functional connectivity and behavior. *Cerebral Cortex*. 2016;27(9):4492-4502.
66. Gupta A, Mayer EA, Sanmiguel CP, et al. Patterns of brain structural connectivity differentiate normal weight from overweight subjects. *NeuroImage: Clinical*. 2015;7:506-517.



67. Riederer JW, Shott ME, Deguzman M, Pryor TL, Frank GW. Understanding Neuronal Architecture in Obesity through Analysis of White Matter Connection Strength. *Frontiers in Human Neuroscience*. 2016;10(271).
68. Li R, Smith DV, Clithero JA, Venkatraman V, Carter RM, Huettel SA. Reason's Enemy Is Not Emotion: Engagement of Cognitive Control Networks Explains Biases in Gain/Loss Framing. *The Journal of Neuroscience*. 2017.
69. Riedel MC, Yanes JA, Ray KL, et al. Dissociable meta-analytic brain networks contribute to coordinated emotional processing. *Human brain mapping*. 2018.
70. Wang S, Taren AA, Smith DV. Functional Parcellation of the Default Mode Network: A Large-Scale Meta-Analysis. *bioRxiv*. 2018.
71. Raichle ME, MacLeod AM, Snyder AZ, Powers WJ, Gusnard DA, Shulman GL. A default mode of brain function. *Proceedings of the National Academy of Sciences*. 2001;98(2):676-682.
72. Buckner RL, Andrews-Hanna JR, Schacter DL. The brain's default network: anatomy, function, and relevance to disease. *Ann N Y Acad Sci*. 2008;1124:1-38.
73. Beyer F, Kharabian Masouleh S, Huntenburg JM, et al. Higher body mass index is associated with reduced posterior default mode connectivity in older adults. *Hum Brain Mapp*. 2017.
74. Nordenskjöld R, Malmberg F, Larsson E-M, et al. Intracranial volume estimated with commonly used methods could introduce bias in studies including brain volume measurements. *Neuroimage*. 2013;83:355-360.
75. Ruigrok AN, Salimi-Khorshidi G, Lai M-C, et al. A meta-analysis of sex differences in human brain structure. *Neuroscience & Biobehavioral Reviews*. 2014;39:34-50.
76. Kuczumski R, Ogden C, Grummer-Strawn L, et al. CDC Growth Charts: United States Advance data from vital and health statistics. Vol Number 314 + December 4, 2000 (Revised): National Center for Health Statistics, Centers of Disease Control and Prevention; 2000.
77. Cole TJ, Freeman JV, Preece MA. Body mass index reference curves for the UK, 1990. *Archives of disease in childhood*. 1995;73(1):25-29.
78. Brooks SJ, Benedict C, Burgos J, et al. Late-life obesity is associated with smaller global and regional gray matter volumes: a voxel-based morphometric study. *International journal of obesity (2005)*. 2013;37(2):230-236.
79. Honea RA, Szabo-Reed AN, Lepping RJ, et al. Voxel-based morphometry reveals brain gray matter volume changes in successful dieters. *Obesity*. 2016;24(9):1842-1848.
80. Janowitz D, Wittfeld K, Terock J, et al. Association between waist circumference and gray matter volume in 2344 individuals from two adult community-based samples. *Neuroimage*. 2015;122:149-157.
81. Karlsson HK, Tuulari JJ, Hirvonen J, et al. Obesity is associated with white matter atrophy: A combined diffusion tensor imaging and voxel-based morphometric study. *Obesity*. 2013;21(12):2530-2537.
82. Kurth F, Levitt JG, Phillips OR, et al. Relationships between gray matter, body mass index, and waist circumference in healthy adults. *Hum Brain Mapp*. 2013;34(7):1737-1746.
83. Masouleh SK, Arélin K, Horstmann A, et al. Higher body mass index in older adults is associated with lower gray matter volume: implications for memory performance. *Neurobiology of aging*. 2016;40:1-10.

84. Mathar D, Horstmann A, Pleger B, Villringer A, Neumann J. Is it Worth the Effort? Novel Insights into Obesity-Associated Alterations in Cost-Benefit Decision-Making. *Frontiers in behavioral neuroscience*. 2015;9.
85. Mueller K, Möller HE, Horstmann A, et al. Physical exercise in overweight to obese individuals induces metabolic-and neurotrophic-related structural brain plasticity. *Frontiers in human neuroscience*. 2015;9.
86. Opel N, Redlich R, Grotegerd D, et al. Obesity and major depression: body-mass index (BMI) is associated with a severe course of disease and specific neurostructural alterations. *Psychoneuroendocrinology*. 2015;51:219-226.
87. Smucny J, Cornier MA, Eichman LC, Thomas EA, Bechtell JL, Tregellas JR. Brain structure predicts risk for obesity. *Appetite*. 2012;59(3):859-865.
88. Tuulari JJ, Pham T, Salminen P, et al. Bariatric Surgery Induces White and Grey Matter Density Recovery in the Morbidly Obese: A Voxel-Based Morphometric Study.
